# Supplementary material
Source: publisher site journal article supplement (https://www.spandidos-publications.com/2844/downloadSupplementary)
Supplement: Supplementary file 1 [file downloadSupplementary]

## Sheet: Sheet1
Table SI. The URLs of the datasets registered in the Sequence Read Archive (SRA) repository.
Object ID	URL
RUN:16866033	ncbi.nlm.nih.gov/sra/RUN:16866033
RUN:16866032	ncbi.nlm.nih.gov/sra/RUN:16866032
RUN:16866031	ncbi.nlm.nih.gov/sra/RUN:16866031
RUN:16866030	ncbi.nlm.nih.gov/sra/RUN:16866030
RUN: 16866029	ncbi.nlm.nih.gov/sra/RUN: 16866029
RUN:16866028	ncbi.nlm.nih.gov/sra/RUN: 16866028
RUN:16866027	ncbi.nlm.nih.gov/sra/RUN:16866027
RUN:16866026	ncbi.nlm.nih.gov/sra/RUN:16866026
RUN:16866025	ncbi.nlm.nih.gov/sra/RUN:16866025
RUN:16866024	ncbi.nlm.nih.gov/sra/RUN:16866024
RUN:16866023	ncbi.nlm.nih.gov/sra/RUN:16866023
RUN:16866022	ncbi.nlm.nih.gov/sra/RUN:16866022
RUN:16866021	ncbi.nlm.nih.gov/sra/RUN:16866021
RUN:16866020	ncbi.nlm.nih.gov/sra/RUN:16866020
RUN:16866019	ncbi.nlm.nih.gov/sra/RUN:16866019
RUN:16866018	ncbi.nlm.nih.gov/sra/RUN:16866018
RUN:16866017	ncbi.nlm.nih.gov/sra/RUN:16866017
RUN:16866016	ncbi.nlm.nih.gov/sra/RUN:16866016
RUN:16866015	ncbi.nlm.nih.gov/sra/RUN:16866015
RUN:16866014	ncbi.nlm.nih.gov/sra/RUN:16866014
RUN:16866013	ncbi.nlm.nih.gov/sra/RUN:16866013
RUN:16866012	ncbi.nlm.nih.gov/sra/RUN:16866012
RUN:16866011	ncbi.nlm.nih.gov/sra/RUN:16866011
RUN:16866010	ncbi.nlm.nih.gov/sra/RUN:16866010
RUN:16866009	ncbi.nlm.nih.gov/sra/RUN:16866009
RUN:16866008	ncbi.nlm.nih.gov/sra/RUN:16866008
RUN:16866007	ncbi.nlm.nih.gov/sra/RUN:16866007
RUN:16866006	ncbi.nlm.nih.gov/sra/RUN:16866006
RUN:16866005	ncbi.nlm.nih.gov/sra/RUN:16866005
RUN:16866004	ncbi.nlm.nih.gov/sra/RUN:16866004
RUN:16866003	ncbi.nlm.nih.gov/sra/RUN:16866003
RUN:16866002	ncbi.nlm.nih.gov/sra/RUN:16866002
RUN:16866001	ncbi.nlm.nih.gov/sra/RUN:16866001
RUN:16866000	ncbi.nlm.nih.gov/sra/RUN:16866000
RUN:16865999	ncbi.nlm.nih.gov/sra/RUN:16865999
RUN:16865998	ncbi.nlm.nih.gov/sra/RUN:16865998
RUN:16865997	ncbi.nlm.nih.gov/sra/RUN:16865997
RUN:16865996	ncbi.nlm.nih.gov/sra/RUN:16865996
RUN:16865995	ncbi.nlm.nih.gov/sra/RUN:16865995
RUN:16865994	ncbi.nlm.nih.gov/sra/RUN:16865994
RUN:16865993	ncbi.nlm.nih.gov/sra/RUN:16865993
RUN:16865992	ncbi.nlm.nih.gov/sra/RUN:16865992
RUN:16865991	ncbi.nlm.nih.gov/sra/RUN:16865991
RUN:16865990	ncbi.nlm.nih.gov/sra/RUN:16865990
RUN:16865989	ncbi.nlm.nih.gov/sra/RUN:16865989
RUN:16865988	ncbi.nlm.nih.gov/sra/RUN:16865988
RUN:16865987	ncbi.nlm.nih.gov/sra/RUN:16865987
RUN:16865986	ncbi.nlm.nih.gov/sra/RUN:16865986
RUN:16865985	ncbi.nlm.nih.gov/sra/RUN:16865985
RUN:16865984	ncbi.nlm.nih.gov/sra/RUN:16865984
RUN:16865983	ncbi.nlm.nih.gov/sra/RUN:16865983
RUN:16865982	ncbi.nlm.nih.gov/sra/RUN:16865982
RUN:16865981	ncbi.nlm.nih.gov/sra/RUN:16865981
RUN:16865980	ncbi.nlm.nih.gov/sra/RUN:16865980
RUN:16865979	ncbi.nlm.nih.gov/sra/RUN:16865979
RUN:16865978	ncbi.nlm.nih.gov/sra/RUN:16865978
RUN:16865977	ncbi.nlm.nih.gov/sra/RUN:16865977
RUN:16865976	ncbi.nlm.nih.gov/sra/RUN:16865976
RUN:16865975	ncbi.nlm.nih.gov/sra/RUN:16865975
RUN:16865974	ncbi.nlm.nih.gov/sra/RUN:16865974
RUN:16865973	ncbi.nlm.nih.gov/sra/RUN:16865973
RUN:16865972	ncbi.nlm.nih.gov/sra/RUN:16865972
RUN:16865971	ncbi.nlm.nih.gov/sra/RUN:16865971
RUN:16865970	ncbi.nlm.nih.gov/sra/RUN:16865970
RUN:16865969	ncbi.nlm.nih.gov/sra/RUN:16865969
RUN:16865968	ncbi.nlm.nih.gov/sra/RUN:16865968
RUN:16865967	ncbi.nlm.nih.gov/sra/RUN:16865967
RUN:16865966	ncbi.nlm.nih.gov/sra/RUN:16865966
RUN:16865965	ncbi.nlm.nih.gov/sra/RUN:16865965
RUN:16865964	ncbi.nlm.nih.gov/sra/RUN:16865964
RUN:16865963	ncbi.nlm.nih.gov/sra/RUN:16865963
RUN:16865962	ncbi.nlm.nih.gov/sra/RUN:16865962
RUN:16865961	ncbi.nlm.nih.gov/sra/RUN:16865961
RUN:16865960	ncbi.nlm.nih.gov/sra/RUN:16865960
RUN:16865959	ncbi.nlm.nih.gov/sra/RUN:16865959
RUN:16865958	ncbi.nlm.nih.gov/sra/RUN:16865958
RUN:16865957	ncbi.nlm.nih.gov/sra/RUN:16865957
RUN:16865956	ncbi.nlm.nih.gov/sra/RUN:16865956
RUN:16865955	ncbi.nlm.nih.gov/sra/RUN:16865955
RUN:16865954	ncbi.nlm.nih.gov/sra/RUN:16865954
RUN:16865953	ncbi.nlm.nih.gov/sra/RUN:16865953
RUN:16865952	ncbi.nlm.nih.gov/sra/RUN:16865952
RUN:16865951	ncbi.nlm.nih.gov/sra/RUN:16865951
RUN:16865950	ncbi.nlm.nih.gov/sra/RUN:16865950
RUN:16865949	ncbi.nlm.nih.gov/sra/RUN:16865949
RUN:16865948	ncbi.nlm.nih.gov/sra/RUN:16865948
RUN:16865947	ncbi.nlm.nih.gov/sra/RUN:16865947
RUN:16865946	ncbi.nlm.nih.gov/sra/RUN:16865946
RUN:16865945	ncbi.nlm.nih.gov/sra/RUN:16865945
RUN:16865944	ncbi.nlm.nih.gov/sra/RUN:16865944
RUN:16865943	ncbi.nlm.nih.gov/sra/RUN:16865943
RUN:16865942	ncbi.nlm.nih.gov/sra/RUN:16865942
RUN:16865941	ncbi.nlm.nih.gov/sra/RUN:16865941
RUN:16865940	ncbi.nlm.nih.gov/sra/RUN:16865940
RUN:16865939	ncbi.nlm.nih.gov/sra/RUN:16865939
